# Supplementary material for: The Pharmacogenetics of Type 2 Diabetes: A Systematic Review
Source: Oxford University Press journal article supplement (doi:10.2337/dc13-1276), 2014-02-11
Supplement: dc131276supplementarydata1.pdf [file dc131276supplementarydata1.pdf]

SUPPLEMENTARY DATA

**Supplementary Table 1.** Search Strategy

| Database | Terms                                                                                                                                                                                                                                                                                                                                                                                                                                                                                                                                                                                                                                                                                                                                                                                                                                                                                                                                                                                                                                                                                                                                                                                                                                                                                                                                                                                                                                                                                                                                                                                                                                                                                                                                                                                                                                                                                                                                                                                                                                                                                                                                                                                                                     |
|----------|---------------------------------------------------------------------------------------------------------------------------------------------------------------------------------------------------------------------------------------------------------------------------------------------------------------------------------------------------------------------------------------------------------------------------------------------------------------------------------------------------------------------------------------------------------------------------------------------------------------------------------------------------------------------------------------------------------------------------------------------------------------------------------------------------------------------------------------------------------------------------------------------------------------------------------------------------------------------------------------------------------------------------------------------------------------------------------------------------------------------------------------------------------------------------------------------------------------------------------------------------------------------------------------------------------------------------------------------------------------------------------------------------------------------------------------------------------------------------------------------------------------------------------------------------------------------------------------------------------------------------------------------------------------------------------------------------------------------------------------------------------------------------------------------------------------------------------------------------------------------------------------------------------------------------------------------------------------------------------------------------------------------------------------------------------------------------------------------------------------------------------------------------------------------------------------------------------------------------|
| PubMed   | <p>(“diabetes mellitus, type 2”[mh] or (diabet*[tiab] and (“non-insulin dependent”[tiab] or type-2[tiab] or “type II”[tiab] or “type 2”[tiab])) or “glucose intolerance”[mh] or (“impaired glucose”[tiab] and (toleran*[tiab] or stat*[tiab] or respons*[tiab] or control*[tiab] or regul*[tiab] or metab*[tiab] or homest*[tiab])) or (“impaired fasting”[tiab] and (glucose[tiab] or glycaemi*[tiab] or glycemi*[tiab] or bloodglucose[tiab] or “blood glucose”[tiab])) or IGT[tiab] or IFG[tiab] or “glucose intolerance”[tiab] or “glucose intolerant”[tiab] or prediabet*[tiab] or “pre-diabetes”[tiab] or “pre-diabetics”[tiab] or “pre-diabetic”[tiab]) AND (“hypoglycemic agents”[mh] or “thiazolidinediones”[mh] or “glipizide”[mh] or “glyburide”[mh] or “metformin”[mh] or “acarbose”[mh] or “Dipeptidyl-Peptidase IV Inhibitors”[mh] or bromocriptine[mh] or “insulin, nph”[mh] or “Insulin/analogues and derivatives”[mh] or insulin[mh] or thiazolidinedione*[tiab] or pioglitazone[tiab] or rosiglitazone[tiab] or sulfonylurea*[tiab] or sulphonylurea*[tiab] or glipizide[tiab] or glyburide[tiab] or glimepiride[tiab] or glibenclamide[tiab] or biguanide*[tiab] or metformin[tiab] or “insulin secretagogues”[tiab] or meglitinide*[tiab] or repaglinide[tiab] or nateglinide[tiab] or “alpha-glucosidase inhibitors”[tiab] or “alpha-glucosidase inhibitor”[tiab] or acarbose[tiab] or miglitol[tiab] or sitagliptin*[tiab] or dpp-4[tiab] or dpp-iv[tiab] or exenatide[tiab] or bromocriptine[tiab] or nph[tiab] or “neutral protamine hagedorn”[tiab] or insulin[tiab] or glargine[tiab] or detemir[tiab] or aspart[tiab] or lispro[tiab] or amylin[tiab] or pramlintide[tiab] or colesevelam[tiab] or (oral*[tiab] AND (hypoglycemic[tiab] or hypoglycaemic[tiab] or anti-hyperglycemic[tiab] or anti-hyperglycaemic[tiab] or antihyperglycemic[tiab] or antihyperglycaemic[tiab] or anti-diabet*[tiab] or antidiabet*[tiab]))) AND ((allel*[tiab] or gene*[tiab] or genotyp*[tiab] and (polymorphi*[tiab] or variant*[tiab] or variation*[tiab]) or pharmacogenetic*[tiab] or SNP[tiab]) AND English[lang] NOT (animal[mh] NOT human [mh]) NOT (letter[pt] or comment[pt] or editorial[pt]))</p> |
| EMBASE   | <p>('non insulin dependent diabetes mellitus'/exp OR 'non insulin dependent diabetes mellitus' or (diabet*:ti,ab and (“non-insulin dependent”:ti,ab or type-2:ti,ab or “type II”:ti,ab or “type 2”:ti,ab)) or 'impaired glucose tolerance'/exp or (“impaired glucose”:ti,ab and (toleran*:ti,ab or stat*:ti,ab or respons*:ti,ab or control*:ti,ab or regul*:ti,ab or metab*:ti,ab or homest*:ti,ab)) or (“impaired fasting”:ti,ab and (glucose:ti,ab or glycaemi*:ti,ab or glycemi*:ti,ab or bloodglucose:ti,ab or “blood glucose”:ti,ab)) or IGT:ti,ab or IFG:ti,ab or “glucose intolerance”:ti,ab or “glucose intolerant”:ti,ab or prediabet*:ti,ab or “pre-diabetes”:ti,ab or “pre-diabetics”:ti,ab or “pre-diabetic”:ti,ab) AND ('oral antidiabetic agent'/exp or 'thiazolidinedione'/exp or 'rosiglitazone'/exp or 'pioglitazone'/exp or 'glipizide'/exp or 'glyburide'/exp or 'glimepiride'/exp or 'chlorpropamide'/exp or 'tolbutamide'/exp or 'metformin'/exp or 'meglitinide'/exp or 'repaglinide'/exp or 'nateglinide'/exp or 'alpha glucosidase inhibitor'/exp or 'acarbose'/exp or 'miglitol'/exp or 'dipeptidyl peptidase IV inhibitor'/exp or 'sitagliptin'/exp or 'exenatide 4'/exp or 'bromocriptine'/exp or 'colesevelam'/exp or 'isophane insulin'/exp or 'biphasic insulin'/exp or 'human insulin'/exp or 'insulin aspart'/exp or 'insulin detemir'/exp or 'insulin glargine'/exp or 'insulin lispro'/exp or 'long acting insulin'/exp or thiazolidinedione*:ti,ab or pioglitazone:ti,ab or rosiglitazone:ti,ab or sulfonylurea*:ti,ab or sulphonylurea*:ti,ab or glipizide:ti,ab or glyburide:ti,ab or glimepiride:ti,ab or glibenclamide:ti,ab or chlorpropamide:ti,ab or tolbutamide:ti,ab or biguanide*:ti,ab or metformin:ti,ab or “insulin secretagogues”:ti,ab or meglitinide*:ti,ab or repaglinide:ti,ab or nateglinide:ti,ab or “alpha-glucosidase inhibitors”:ti,ab or “alpha-glucosidase inhibitor”:ti,ab or</p>                                                                                                                                                                                                                                                                           |

SUPPLEMENTARY DATA

|                 |                                                                                                                                                                                                                                                                                                                                                                                                                                                                                                                                                                                                                                                                                                                                                                                                                                                                                                                                                                                                                                                                                                                                                                                                                                                                                                                                                                                                                                                                                                                                                                                                                                                                                                                                                                                                                                                                                                                                                                                                                                                                                                                                                     |
|-----------------|-----------------------------------------------------------------------------------------------------------------------------------------------------------------------------------------------------------------------------------------------------------------------------------------------------------------------------------------------------------------------------------------------------------------------------------------------------------------------------------------------------------------------------------------------------------------------------------------------------------------------------------------------------------------------------------------------------------------------------------------------------------------------------------------------------------------------------------------------------------------------------------------------------------------------------------------------------------------------------------------------------------------------------------------------------------------------------------------------------------------------------------------------------------------------------------------------------------------------------------------------------------------------------------------------------------------------------------------------------------------------------------------------------------------------------------------------------------------------------------------------------------------------------------------------------------------------------------------------------------------------------------------------------------------------------------------------------------------------------------------------------------------------------------------------------------------------------------------------------------------------------------------------------------------------------------------------------------------------------------------------------------------------------------------------------------------------------------------------------------------------------------------------------|
|                 | <p>acarbose:ti,ab or miglitol:ti,ab or sitagliptin*:ti,ab or dpp-4:ti,ab or dpp-iv:ti,ab or exenatide:ti,ab or bromocriptine:ti,ab or colesevelam:ti,ab or nph:ti,ab or “neutral protamine hagedorn”:ti,ab or insulin:ti,ab or glargine:ti,ab or detemir:ti,ab or aspart:ti,ab or lispro:ti,ab or amylin:ti,ab or pramlintide:ti,ab or (oral*:ti,ab AND (hypoglycemic:ti,ab or hypoglycaemic:ti,ab or anti-hyperglycemic:ti,ab or anti-hyperglycaemic:ti,ab or antihyperglycemic:ti,ab or antihyperglycaemic:ti,ab or anti-diabetic:ti,ab or anti-diabetes:ti,ab or antidiabet*:ti,ab))) AND ((allele*:ti,ab or gene*:ti,ab or genotyp*:ti,ab) and (polymorphi*:ti,ab or variant*:ti,ab or variation*:ti,ab) or pharmacogenetic*:ti,ab or SNP:ti,ab or 'genotype'/exp) AND [english]/lim NOT ([animals]/lim NOT [humans]/lim) NOT (letter:it or comment:it or editorial:it)</p>                                                                                                                                                                                                                                                                                                                                                                                                                                                                                                                                                                                                                                                                                                                                                                                                                                                                                                                                                                                                                                                                                                                                                                                                                                                                     |
| <p>Cochrane</p> | <p>((diabet*:ti,ab,kw and (“non-insulin dependent”:ti,ab,kw or type-2:ti,ab,kw or “type II”:ti,ab,kw or “type 2”:ti,ab,kw)) or (“impaired glucose”:ti,ab,kw and (toleran*:ti,ab,kw or stat*:ti,ab,kw or respons*:ti,ab,kw or control*:ti,ab,kw or regul*:ti,ab,kw or metab*:ti,ab,kw or homest*:ti,ab,kw)) or</p> <p>#1 (“impaired fasting”:ti,ab,kw and (glucose:ti,ab,kw or glycaemi*:ti,ab,kw or glycem*:ti,ab,kw or bloodglucose:ti,ab,kw or “blood glucose”:ti,ab,kw)) or IGT:ti,ab,kw or IFG:ti,ab,kw or “glucose intolerance”:ti,ab,kw or “glucose intolerant”:ti,ab,kw or prediabet*:ti,ab,kw or “pre-diabetes”:ti,ab,kw or “pre-diabetics”:ti,ab,kw or “pre-diabetic”:ti,ab,kw)</p> <p>(thiazolidinedione*:ti,ab,kw or pioglitazone:ti,ab,kw or rosiglitazone:ti,ab,kw or sulfonylurea*:ti,ab,kw or sulphonylurea*:ti,ab,kw or glipizide:ti,ab,kw or glyburide:ti,ab,kw or glimepiride:ti,ab,kw or glibenclamide:ti,ab,kw or chlorpropamide:ti,ab,kw or tolbutamide:ti,ab,kw or biguanide*:ti,ab,kw or metformin:ti,ab,kw or “insulin secretagogues”:ti,ab,kw or meglitinide*:ti,ab,kw or repaglinide:ti,ab,kw or nateglinide:ti,ab,kw or “alpha-glucosidase inhibitors”:ti,ab,kw or “alpha-glucosidase</p> <p>#2 inhibitor”:ti,ab,kw or acarbose:ti,ab,kw or miglitol:ti,ab,kw or sitagliptin*:ti,ab,kw or dpp-4:ti,ab,kw or dpp-iv:ti,ab,kw or exenatide:ti,ab,kw or bromocriptine:ti,ab,kw or colesevelam:ti,ab,kw or nph:ti,ab,kw or “neutral protamine hagedorn”:ti,ab,kw or insulin:ti,ab,kw or glargine:ti,ab,kw or detemir:ti,ab,kw or aspart:ti,ab,kw or lispro:ti,ab,kw or amylin:ti,ab,kw or pramlintide:ti,ab,kw or (oral*:ti,ab,kw AND (hypoglycemic:ti,ab,kw or hypoglycaemic:ti,ab,kw or anti-hyperglycemic:ti,ab,kw or anti-hyperglycaemic:ti,ab,kw or antihyperglycemic:ti,ab,kw or antihyperglycaemic:ti,ab,kw or anti-diabetic:ti,ab,kw or anti-diabetes:ti,ab,kw or antidiabet*:ti,ab,kw)))</p> <p>#3 ((allele*:ti,ab,kw or gene*:ti,ab,kw or genotyp*:ti,ab,kw) and (polymorphi*:ti,ab,kw or variant*:ti,ab,kw or variation*:ti,ab,kw) or pharmacogenetic*:ti,ab,kw or SNP:ti,ab,kw)</p> <p>#4 (#1 AND #2 AND #3)</p> |

SUPPLEMENTARY DATA

**Supplementary Table 2.** Key journals included in manual search of tables of contents

|                                  |
|----------------------------------|
| Acta Pharmacol Sin               |
| Br J Clin Pharmacol              |
| Clin Pharmacol Ther              |
| Diabet Med                       |
| Diabetes                         |
| Diabetes Care                    |
| Diabetes Res Clin Pract          |
| Diabetes, Obesity and Metabolism |
| Diabetologia                     |
| Eur J Clin Pharmacol             |
| Horm Metab Res                   |
| Int J Clin Pract                 |
| J Clin Endocrinol Metab          |
| Pharmacogenet                    |
| The Pharmacogenomics Journal     |

SUPPLEMENTARY DATA

**Supplementary Table 3.** FDA-approved medications for type 2 diabetes at time of study inception

|                                                   |
|---------------------------------------------------|
| <b>Sulfonylureas</b>                              |
| chlorpropamide                                    |
| tolbutamide                                       |
| glipizide                                         |
| glyburide/glibenclamide                           |
| glimepiride                                       |
| <b>Metformin</b>                                  |
| <b>Thiazolidinediones</b>                         |
| rosiglitazone                                     |
| pioglitazone                                      |
| <b>Meglitinides</b>                               |
| repaglinide                                       |
| nateglinide                                       |
| <b><math>\alpha</math> glucosidase inhibitors</b> |
| acarbose                                          |
| miglitol                                          |
| <b>Sitagliptin</b>                                |
| <b>Exenatide</b>                                  |
| <b>Bromocriptine</b>                              |
| <b>Colesevelam</b>                                |
| <b>Amylin-based</b>                               |
| amylin                                            |
| pramlintide                                       |
| <b>Insulin</b>                                    |

SUPPLEMENTARY DATA

**Supplementary Table 4.** Interaction between metformin and selected SNPs for incident diabetes or attainment of HbA1c <7%

| Author                                       | Gene           | SNP        | Outcome   | Follow up | Variant 1  | Referent variant | Adjusted HR (95% CI)                                                                |
|----------------------------------------------|----------------|------------|-----------|-----------|------------|------------------|-------------------------------------------------------------------------------------|
| <b>Metformin transporters in hepatocytes</b> |                |            |           |           |            |                  |                                                                                     |
| Zhou, 2009 (1)                               | <i>SLC22A1</i> | rs4646281  | HbA1c <7% | 18 mo     | Deletion   | A                | Adjusted OR: 0.98                                                                   |
| Zhou, 2009 (1)                               | <i>SLC22A1</i> | rs12208357 | HbA1c <7% | 18 mo     | T          | C                | Adjusted OR: 1.16 <sup>a</sup>                                                      |
| Jablonski, 2010 (2)                          | <i>SLC22A1</i> | rs683369   | DM        | 3.2 yrs   | G          | C                | <b>Metformin: 1.45 (1.12 to 1.88)</b>                                               |
|                                              |                |            |           |           |            |                  | <b>Placebo: 0.99 (0.77 to 1.27)</b>                                                 |
| Tkac, 2013 (3)                               | <i>SLC22A1</i> | rs622342   | HbA1c     | 6 mo      | AA, AC, CC |                  | AA: -0.64% (-7 mmol/mol), AC: -0.69% (-7.5 mmol/mol), CC: -0.68% (-7.4 mmol/mol)    |
| Jablonski, 2010 <sup>b</sup> (2)             | <i>SLC22A2</i> | rs662301   | DM        | 3.2 yrs   | T          | C                | <b>Metformin: 1.57 (1.09 to 2.27)</b>                                               |
|                                              |                |            |           |           |            |                  | <b>Placebo: 0.78 (0.49 1.22)</b>                                                    |
| Florez, 2012 (4)                             | <i>SLC22A2</i> | rs11920090 | FG        | 1 yr      | T          | A                | P for interaction =0.88                                                             |
| Tkac, 2013 (3)                               | <i>SLC22A2</i> | rs316019   | HbA1c     | 6 mo      | GG, GT, TT |                  | GG: -0.69% (-7.5 mmol/mol), GT: -0.92% (-10.1 mmol/mol)                             |
| Choi, 2011 (5)                               | <i>SLC22A2</i> | rs316019   | HbA1c     | 160 days  | GG         | GT, TT           | GG: -0.14% (-1.5 mmol/mol), GT/TT: -0.13% (-1.4 mmol/mol)                           |
| Jablonski, 2010 <sup>b</sup> (2)             | <i>SLC47A1</i> | rs8065082  | DM        | 3.2 yrs   | T          | C                | <b>Metformin: 0.78 (0.64 to 0.96)</b>                                               |
|                                              |                |            |           |           |            |                  | <b>Placebo: 1.15 (0.97 to 1.37)</b>                                                 |
| Choi, 2011 (5)                               | <i>SLC47A1</i> | rs2289669  | HbA1c     | 160 days  | GG, GA     | AA               | GG: -0.14% (-1.5 mmol/mol), GA: -0.12% (-1.3 mmol/mol), AA: -0.17% (-1.9 mmol/mol)  |
| Tkac, 2013 (3)                               | <i>SLC47A1</i> | rs2289669  | HbA1c     | 6 mo      | GG, GA, AA | N/A              | GG: -0.61% (-6.7 mmol/mol), GA: -0.52% (-5.7 mmol/mol), AA: -1.10% (-12.0 mmol/mol) |
| <b>AMPK pathway/Gluconeogenesis</b>          |                |            |           |           |            |                  |                                                                                     |
| Jablonski, 2010 <sup>b</sup> (2)             | <i>PRKAA1</i>  | rs249429   | DM        | 3.2 yrs   | C          | T                | <b>Metformin: 0.89 (0.71 to 1.13)</b>                                               |
|                                              |                |            |           |           |            |                  | <b>Placebo 1.22 (1.01 to 1.46)</b>                                                  |

SUPPLEMENTARY DATA

|                                  |                 |               |                   |         |            |    |                                                                     |
|----------------------------------|-----------------|---------------|-------------------|---------|------------|----|---------------------------------------------------------------------|
| Jablonski, 2010 <sup>b</sup> (2) | <i>PRKAB2</i>   | rs6690158     | DM                | 3.2 yrs | T          | C  | <b>Metformin: 1.42 (0.85 to 2.36)</b>                               |
|                                  |                 |               |                   |         |            |    | <b>Placebo: 0.58 (0.33 to 1.03)</b>                                 |
| Jablonski, 2010 <sup>b</sup> (2) | <i>PRKAA2</i>   | rs9803799     | DM                | 3.2 yrs | G          | T  | <b>Metformin: 0.66 (0.43 to 1.02)</b>                               |
|                                  |                 |               |                   |         |            |    | <b>Placebo: 1.17 (0.85 to 1.62)</b>                                 |
| Zhou, 2011 (6)                   | <i>ATM</i>      | rs11212617    | HbA1c <7%         | 18 mo   | C          | A  | <b>1.42 (1.26 to 1.62)<sup>a</sup></b>                              |
| Florez, 2012 (7)                 | <i>ATM</i>      | rs11212617    | DM                | 1 yr    | C          | A  | <b>Metformin: 1.17 (0.96 to 1.42, P=0.13)</b>                       |
|                                  |                 |               |                   |         |            |    | <b>Placebo: 0.84 (0.70 to 1.01, P=0.71)</b>                         |
|                                  |                 |               |                   |         |            |    | <b>P for interaction = 0.04</b>                                     |
| Florez, 2012 (7)                 | <i>ATM</i>      | rs11212617    | Ln(FG)            | 1 yr    | C          | A  | P for interaction =0.31                                             |
| Florez, 2012 (7)                 | <i>ATM</i>      | rs11212617    | Ln(HbA1c)         | 1 yr    | C          | A  | P for interaction =0.77                                             |
| Jablonski, 2010 <sup>b</sup> (2) | <i>STK11</i>    | rs741765      | DM                | 3.2 yrs | T          | C  | <b>Metformin: 0.82 (0.64 to 1.04)</b>                               |
|                                  |                 |               |                   |         |            |    | <b>Placebo: 1.17 (0.96 to 1.43)</b>                                 |
| Jablonski, 2010 <sup>b</sup> (2) | <i>PPARA</i>    | rs4253652     | DM                | 3.2 yrs | G          | A  | <b>Metformin: 2.29 (1.10 to 4.76)</b>                               |
|                                  |                 |               |                   |         |            |    | <b>Placebo: 0.60 (0.27 to 1.33)</b>                                 |
| Jablonski, 2010 <sup>b</sup> (2) | <i>PPARGC1A</i> | rs10213440    | DM                | 3.2 yrs | C          | T  | <b>Metformin: 1.31 (1.03 to 1.66), placebo: 0.76 (0.59 to 0.97)</b> |
| Jablonski, 2010 <sup>b</sup> (2) | <i>PCK1</i>     | rs4810083     | DM                | 3.2 yrs | T          | C  | <b>Metformin 0.84 (0.69 to 1.02)</b>                                |
|                                  |                 |               |                   |         |            |    | <b>Placebo: 1.14 (0.95 to 1.37)</b>                                 |
| <b>Insulin secretion</b>         |                 |               |                   |         |            |    |                                                                     |
| Florez, 2007 (8)                 | <i>KCNJ11</i>   | rs5219 (E23K) | DM                | 3 yrs   |            |    | EE: 0.55 (0.42 to 0.71)                                             |
|                                  |                 |               |                   |         |            |    | EK: 0.89 (0.66 to 1.19)                                             |
|                                  |                 |               |                   |         |            |    | KK: 0.95 (0.54 to 1.67)                                             |
| Jablonski, 2010 <sup>b</sup> (2) | <i>KCNJ11</i>   | rs7124355     | DM                | 3.2 yrs | A          | G  | <b>Metformin: 1.25 (0.99 to 1.59)</b>                               |
|                                  |                 |               |                   |         |            |    | <b>Placebo: 0.84 (0.68 to 1.04)</b>                                 |
| Jablonski, 2010 <sup>b</sup> (2) | <i>ABCC8</i>    | rs4148609     | DM                | 3.2 yrs | A          | G  | <b>Metformin: 0.79 (0.63 to 0.98)</b>                               |
|                                  |                 |               |                   |         |            |    | <b>Placebo: 1.24 (1.04 to 1.48)</b>                                 |
| Pearson, 2007 (9)                | <i>TCF7L2</i>   | rs12255372    | HbA1c ≥7%         | 12 mo   | TT, TG, GG |    | TT: 1.09 (0.63 to 1.91) <sup>a</sup>                                |
|                                  |                 |               |                   |         |            |    | TG: 0.96 (0.70 to 1.33) <sup>a</sup>                                |
| Pearson, 2007 (9)                | <i>TCF7L2</i>   | rs12255372    | Time to HbA1c <7% | 12 mo   |            |    | P=0.82 for log rank test across genotypes (TT, TG, GG)              |
| Florez, 2006 (10)                | <i>TCF7L2</i>   | rs12255372    | DM                | 3 yrs   | TT         | GG | P for interaction not significant                                   |

SUPPLEMENTARY DATA

|                                  |                 |            |           |         |        |    |                                       |
|----------------------------------|-----------------|------------|-----------|---------|--------|----|---------------------------------------|
| Pearson, 2007 (9)                | <i>TCF7L2</i>   | rs7903146  | HbA1c ≥7% | 12 mo   | TT, TC | CC | TT: 1.19 (0.69 to 2.02) <sup>a</sup>  |
|                                  |                 |            |           |         |        |    | TC: 1.17 (0.85 to 1.61) <sup>a</sup>  |
| Florez, 2006 (10)                | <i>TCF7L2</i>   | rs7903146  | DM        | 3 yrs   | TT     | CC | P for interaction not significant     |
| Florez, 2008 (11)                | <i>WFS1</i>     | rs734312   | DM        | 3 yrs   | AG     | AA | Metformin: 1.29 (0.90 to 1.86)        |
|                                  |                 |            |           |         |        |    | Placebo: 0.98 (0.72 to 1.33)          |
| Florez, 2008 (11)                | <i>WFS1</i>     | rs734312   | DM        | 3 yrs   | GG     | AA | Metformin: 1.39 (0.95 to 2.02)        |
|                                  |                 |            |           |         |        |    | Placebo: 1.19 (0.87 to 1.63)          |
| Florez, 2008 (11)                | <i>WFS1</i>     | rs10010131 | DM        | 3 yrs   | GA     | GG | Metformin: 1.17 (0.86 to 1.58)        |
|                                  |                 |            |           |         |        |    | Placebo: 0.97 (0.75 to 1.26)          |
| Florez, 2008 (11)                | <i>WFS1</i>     | rs10010131 | DM        | 3 yrs   | AA     | GG | Metformin: 1.21 (0.80 to 1.83)        |
|                                  |                 |            |           |         |        |    | Placebo: 1.15 (0.78 to 1.71)          |
| Florez, 2008 (11)                | <i>WFS1</i>     | rs752854   | DM        | 3 yrs   | GA     | AA | Metformin: 1.11 (0.82 to 1.50)        |
|                                  |                 |            |           |         |        |    | Placebo: 1.09 (0.84 to 1.40)          |
| Florez, 2008 (11)                | <i>WFS1</i>     | rs752854   | DM        | 3 yrs   | GG     | AA | Metformin: 1.18 (0.73 to 1.89)        |
|                                  |                 |            |           |         |        |    | Placebo: 1.14 (0.73 to 1.79)          |
| Moore, 2008 (12)                 | <i>CDKN2A/B</i> | rs10811661 | DM        | 3 yrs   | T      | C  | <b>Metformin: 0.81 (0.59 to 1.12)</b> |
|                                  |                 |            |           |         |        |    | <b>Placebo: 1.22 (0.96 to 1.54)</b>   |
| Jablonski, 2010 <sup>b</sup> (2) | <i>HNF4A</i>    | rs11086926 | DM        | 3.2 yrs | G      | T  | <b>Metformin: 1.81 (1.35 to 2.43)</b> |
|                                  |                 |            |           |         |        |    | <b>Placebo: 0.82 (0.61 to 1.11)</b>   |
| Jablonski, 2010 <sup>b</sup> (2) | <i>HNF1B</i>    | rs11868513 | DM        | 3.2 yrs | A      | G  | <b>Metformin: 0.87 (0.65 to 1.16)</b> |
|                                  |                 |            |           |         |        |    | <b>Placebo: 1.69 (1.36 to 2.10)</b>   |
| Florez, 2012 (4)                 | <i>GLIS3</i>    | rs7034200  | FG        | 1 yr    | A      | C  | P for interaction =0.72               |
| Florez, 2012 (4)                 | <i>G6PC2</i>    | rs573225   | FG        | 1 yr    | A      | G  | P for interaction =0.96               |
| Florez, 2012 (4)                 | <i>MADD</i>     | rs7944584  | FG        | 1 yr    | A      | T  | <b>P for interaction =0.04</b>        |
| Florez, 2012 (4)                 | <i>MTNR1B</i>   | rs10830963 | FG        | 1 yr    | G      | C  | P for interaction =0.68               |
| Florez, 2012 (4)                 | <i>ADCY5</i>    | rs11708067 | FG        | 1 yr    | A      | G  | P for interaction =0.80               |
| <b>Insulin sensitivity</b>       |                 |            |           |         |        |    |                                       |
| Jablonski, 2010 <sup>b</sup> (2) | <i>ADIPOR2</i>  | rs758027   | DM        | 3.2 yrs | C      | T  | <b>Metformin: 1.31 (0.76 to 2.29)</b> |
|                                  |                 |            |           |         |        |    | <b>Placebo 0.34 (0.15 to 0.75)</b>    |
| Moore, 2009 (13)                 | <i>ENPP1</i>    | rs1044498  | DM        | 3 yrs   | CC/CA  | AA | <b>Metformin: 1.09 (0.78 to 1.53)</b> |
|                                  |                 |            |           |         |        |    | <b>Placebo: 1.36 (1.02 to 1.80)</b>   |
| Jablonski, 2010 <sup>b</sup> (2) | <i>CAPN10</i>   | rs3792269  | DM        | 3.2 yrs | G      | A  | <b>Metformin: 0.95 (0.70 to 1.28)</b> |

SUPPLEMENTARY DATA

|                                  |                 |            |       |         |    |       |                                                                       |
|----------------------------------|-----------------|------------|-------|---------|----|-------|-----------------------------------------------------------------------|
|                                  |                 |            |       |         |    |       | <b>Placebo: 1.61 (1.28 to 2.02)</b>                                   |
| Jablonski, 2010 <sup>b</sup> (2) | <i>GCK</i>      | rs2908289  | DM    | 3.2 yrs | A  | G     | <b>Metformin: 1.29 (1.02 to 1.64)</b>                                 |
|                                  |                 |            |       |         |    |       | <b>Placebo: 0.86 (0.69 to 1.08)</b>                                   |
| Florez, 2012 (4)                 | <i>GCK</i>      | rs917793   | FG    | 1 yr    | T  | A     | P for interaction = 0.07                                              |
| Florez, 2012 (4)                 | <i>IRS1</i>     | rs4675095  | FG    | 1 yr    | A  | T     | P for interaction =0.21                                               |
| Florez, 2012 (4)                 | <i>IGF1</i>     | rs855228   | FG    | 1 yr    | T  | C     | P for interaction =0.39                                               |
| Florez, 2012 (4)                 | <i>GCKR</i>     | rs780094   | FG    | 1 yr    | C  | T     | P for interaction =0.57                                               |
| <b>Energy Metabolism</b>         |                 |            |       |         |    |       |                                                                       |
| Jablonski, 2010 <sup>b</sup> (2) | <i>MEF2A</i>    | rs424892   | DM    | 3.2 yrs | G  | A     | <b>Metformin: 1.43 (1.14 to 1.80)</b>                                 |
|                                  |                 |            |       |         |    |       | <b>Placebo: 0.88 (0.72 to 1.09)</b>                                   |
| Jablonski, 2010 <sup>b</sup> (2) | <i>MEF2D</i>    | rs6666307  | DM    | 3.2 yrs | T  | A     | <b>Metformin: 2.15 (1.22 to 3.80)</b>                                 |
|                                  |                 |            |       |         |    |       | <b>Placebo: 0.54 (0.26 to 1.09)</b>                                   |
| Florez, 2012 (4)                 | <i>CRY2</i>     | rs11605924 | FG    | 1 yr    | A  | C     | P for interaction =0.20                                               |
| <b>Other</b>                     |                 |            |       |         |    |       |                                                                       |
| Jablonski, 2010 <sup>b</sup> (2) | <i>ITLN2</i>    | rs6701920  | DM    | 3.2 yrs | A  | G     | <b>Metformin: 0.49 (0.17 to 1.40)</b>                                 |
|                                  |                 |            |       |         |    |       | <b>Placebo: 1.86 (1.19 to 2.91)</b>                                   |
| Jablonski, 2010 <sup>b</sup> (2) | <i>GCG</i>      | rs6733736  | DM    | 3.2 yrs | G  | A     | <b>Metformin: 3.70 (1.56 to 8.80)</b>                                 |
|                                  |                 |            |       |         |    |       | <b>Placebo: 0.65 (0.20 to 2.13)</b>                                   |
| Jablonski, 2010 <sup>b</sup> (2) | <i>PKLR</i>     | rs17367421 | DM    | 3.2 yrs | C  | G     | <b>Metformin: 1.21 (0.73 to 1.99)</b>                                 |
|                                  |                 |            |       |         |    |       | <b>Placebo: 0.47 (0.23 to 0.96)</b>                                   |
| Jablonski, 2010 <sup>b</sup> (2) | <i>PPARGC1B</i> | rs741579   | DM    | 3.2 yrs | G  | A     | <b>Metformin: 0.23 (0.03 to 1.62)</b>                                 |
|                                  |                 |            |       |         |    |       | <b>Placebo: 2.41 (1.08 to 5.37)</b>                                   |
| Dong, 2011 (14)                  | <i>SRR</i>      | rs391300   | FG    | 12 wks  | GG | GA+AA | <b>GG: -2.3 mmol/l, GA/AA: -3.3 mmol/l; P =0.024</b>                  |
| Dong, 2011 (14)                  | <i>SRR</i>      | rs391300   | PPG   | 12 wks  | GG | GA+AA | <b>GG: -5.7 mmol/l, GA/AA: -8.8 mmol/l; P =0.048</b>                  |
| Dong, 2011 (14)                  | <i>SRR</i>      | rs391300   | HbA1c | 12 wks  | GG | GA+AA | GG: -1.1% (-12.0 mmol/mol), GA/AA: -2.83% (-30.9 mmol/mol); P = 0.058 |
| Florez, 2012 (4)                 | <i>PROX1</i>    | rs340874   | FG    | 1 yr    | C  | T     | P for interaction =0.81                                               |
| Florez, 2012 (4)                 | <i>DGKB</i>     | rs2191349  | FG    | 1 yr    | T  | G     | P for interaction =0.79                                               |



## SUPPLEMENTARY DATA

|                  |               |            |    |      |    |    |                                |
|------------------|---------------|------------|----|------|----|----|--------------------------------|
| Florez, 2012 (4) | <i>ADRA2A</i> | rs10885122 | FG | 1 yr | G  | T  | P for interaction =0.82        |
| Florez, 2012 (4) | <i>FADS1</i>  | rs174550   | FG | 1 yr | T  | C  | P for interaction =0.58        |
| Florez, 2012 (4) | <i>C2CD4B</i> | rs11071657 | FG | 1 yr | AA | AG | <b>P for interaction =0.04</b> |

Abbreviations: FG, fasting glucose; DM, diabetes mellitus; yr, years; mo, months; wks, weeks; PPG, 2-hour glucose from oral glucose tolerance test

Note: Results in bold indicate significant difference by genotype ( $P < 0.05$ ) or significant interaction with genotype (P for interaction  $< 0.05$ ).

SUPPLEMENTARY DATA

**Supplementary Table 5.** Interaction between sulfonylureas and selected SNPs for glycemic outcomes

| Author Year          | SNP           | Outcome           | Follow up                        | Variant 1 | Referent variant | Effect Measure            | Result                                                                                    |
|----------------------|---------------|-------------------|----------------------------------|-----------|------------------|---------------------------|-------------------------------------------------------------------------------------------|
| <b><i>TCF7L2</i></b> |               |                   |                                  |           |                  |                           |                                                                                           |
| Pearson, 2007 (9)    | rs12255372    | HbA1c ≥7%         | 12 mo                            | TT, GT    | GG               | Adjusted OR               | TT: 2.16 (1.21 to 3.86), GT: 1.14 (0.78 to 1.68); additive model: T vs. G: 1.28 (P <0.05) |
| Pearson, 2007 (9)    | rs7903146     | HbA1c ≥7%         | 12 mo                            | TT, TC    | CC               | Adjusted OR               | TT: 1.90 (1.09 to 3.33), TC: 1.23 (0.84 to 1.81); additive model: T vs. C 1.26 (P <0.05)  |
| Pearson, 2007 (9)    | rs12255372    | Time to HbA1c <7% |                                  | TT        | GG               | HR                        | P=0.03 for log rank test across genotypes                                                 |
| <b><i>KCNJ11</i></b> |               |                   |                                  |           |                  |                           |                                                                                           |
| Gloyn, 2001 (15)     | rs5219 (E23K) | FG                | 12 mo                            |           |                  | Mean change from baseline | No difference across genotype                                                             |
| Gloyn, 2001 (15)     | rs1800467     | FG                | 12 mo                            |           |                  | Mean change from baseline | No difference across genotype                                                             |
| <b><i>CYP2C9</i></b> |               |                   |                                  |           |                  |                           |                                                                                           |
| Suzuki, 2006 (16)    | rs1057910     | HbA1c             | 6 mo                             | 1/1       | 1/3              | Mean change from baseline | Greater decrease (P <0.05)                                                                |
| Becker, 2008 (17)    | rs1799853     | FG                | ≥ 180 days after drug initiation | 1/2, 2/2  | 1/1              | Mean change from baseline | Tolbutamide: -0.28 mmol/l (-0.07 to 0.67 mmol/l)                                          |
| Becker, 2008 (17)    | rs1057910     | FG                | ≥ 180 days after drug initiation | 1/3, 2/3  | 1/1              | Mean change from baseline | Tolbutamide: -1.2 mmol/l (-2.8 to 0.28 mmol/l)                                            |

Abbreviations: SNP, single nucleotide polymorphisms; HbA1c, hemoglobin A1c; OR, odds ratio; mo, months; wks, weeks

SUPPLEMENTARY DATA

**Supplementary Table 6.** Interaction between repaglinide and selected SNPs for glycemic outcomes

| Author, Year     | SNP        | Outcome | Follow up | Mean change from baseline by genotype                                                        |
|------------------|------------|---------|-----------|----------------------------------------------------------------------------------------------|
| <b>KCNJ11</b>    |            |         |           |                                                                                              |
| He, 2008 (18)    | rs5219     | HbA1c   | 6 mo      | <b>GG: -1.52% (-16.6 mmol/mol), GA: -2.33% (-25.5 mmol/mol), AA: -2.65% (-29.0 mmol/mol)</b> |
|                  | rs5219     | FG      | 6 mo      | GG: -2.3 mmol/l, GA: -3.3 mmol/l, AA: -3.1 mmol/l                                            |
|                  | rs5219     | PPG     | 6 mo      | <b>GG: -4.1 mmol/l, GA: -5.8 mmol/l, AA: -3.6 mmol/l<sup>a</sup></b>                         |
| <b>ABCC8</b>     |            |         |           |                                                                                              |
| He, 2008 (18)    | rs1799854  | HbA1c   | 6 mo      | TT: -1.88% (-20.6 mmol/mol), TC: -2.14% (-23.4 mmol/mol), CC: -2.29% (-25.0 mmol/mol)        |
|                  | rs1799854  | FG      | 6 mo      | TT: -2.7 mmol/l, TC: -2.9 mmol/l, CC: -3.4 mmol/l                                            |
|                  | rs1799854  | PPG     | 6 mo      | TT: -4.3 mmol/l, TC: -5.2 mmol/l, CC: -5.1 mmol/l                                            |
| <b>KCNQ1</b>     |            |         |           |                                                                                              |
| Yu, 2011 (19)    | rs2237892  | HbA1c   | 48 wks    | TT: -2.13% (-23.3 mmol/mol), CT: -2.01% (-22.0 mmol/mol), CC: -1.99% (-21.8 mmol/mol)        |
|                  | rs2237892  | FG      | 48 wks    | TT: -4.4 mmol/l, CT: -2.5 mmol/l, CC: -2.3 mmol/l                                            |
|                  | rs2237892  | PPG     | 48 wks    | TT: -7.5 mmol/l, CT: -4.2 mmol/l, CC: -4.3 mmol/l                                            |
|                  | rs2237895  | HbA1c   | 48 wks    | AA: -2.17% (-23.7 mmol/mol), AC: -1.83% (-20.0 mmol/mol), CC: -2.11% (-23.1 mmol/mol)        |
|                  | rs2237895  | FG      | 48 wks    | AA: -2.8 mmol/l, AC: -2.9 mmol/l, CC: -2.7 mmol/l                                            |
|                  | rs2237895  | PPG     | 48 wks    | AA: -4.7 mmol/l, AC: -3.9 mmol/l, CC: -5.0 mmol/l                                            |
|                  | rs2237897  | HbA1c   | 48 wks    | CC: -1.95% (-21.3 mmol/mol), CT: -2% (-21.9 mmol/mol), TT: -2.68% (-29.3 mmol/mol)           |
|                  | rs2237897  | FG      | 48 wks    | CC: -2.4 mmol/l, CT: -2.2 mmol/l, TT: -4.2 mmol/l                                            |
|                  | rs2237897  | PPG     | 48 wks    | CC: -4.0 mmol/l, CT: -4.6 mmol/l, TT: -8.4 mmol/l <sup>a</sup>                               |
| <b>SLC30A8</b>   |            |         |           |                                                                                              |
| Huang, 2010 (20) | rs1326634  | HbA1c   | 8 wks     | CC: -1.57% (-17.2 mmol/mol), CT/TT: -2.11% (-23.1 mmol/mol)                                  |
|                  | rs1326634  | FG      | 8 wks     | CC: -1.9 mmol/l, CT/TT: -2.2 mmol/l                                                          |
|                  | rs1326634  | PPG     | 8 wks     | CC: -4.2 mmol/l, CT/TT: -4.6 mmol/l                                                          |
|                  | rs16889462 | HbA1c   | 8 wks     | <b>GG: -1.43% (-15.6 mmol/mol), GA: -3.19% (-34.9 mmol/mol)</b><br>a,c                       |

SUPPLEMENTARY DATA

|                             |            |       |              |                                                                                       |
|-----------------------------|------------|-------|--------------|---------------------------------------------------------------------------------------|
|                             | rs16889462 | FG    | 8 wks        | <b>GG: -1.6 mmol/l, GA: -3.6 mmol/l<sup>a</sup></b>                                   |
|                             | rs16889462 | PPG   | <b>8 wks</b> | <b>GG: -3.2 mmol/l, GA: -8.4 mmol/l<sup>a</sup></b>                                   |
| Jiang, 2012 (21)            | rs13266634 | HbA1c | 48 wks       | CC: -2.21% (-24.2 mmol/mol), CT: -2.00% (-21.9 mmol/mol), TT: -1.61% (-17.6 mmol/mol) |
|                             | rs13266634 | FG    | 48 wks       | CC: -2.4 mmol/l, CT: -2.6 mmol/l, TT: -2.2 mmol/l                                     |
|                             | rs13266634 | PPG   | 48 wks       | CC: -4.5 mmol/l, CT: -4.4 mmol/l, TT: -3.8 mmol/l                                     |
| <b><i>NOS1AP</i></b>        |            |       |              |                                                                                       |
| Qin, 2010 (22)              | rs10494366 | HbA1c | 24 wks       | GG: -2.07% (-22.6 mmol/mol), GT: -2.18% (-23.8 mmol/mol), TT: -1.61% (-12.7 mmol/mol) |
|                             | rs10494366 | FG    | 24 wks       | GG: -2.9 mmol/l, GT: -2.9 mmol/l, TT: -3.5 mmol/l                                     |
|                             | rs10494366 | PPG   | 24 wks       | GG: -5.4 mmol/l, GT: -4.9 mmol/l, TT: -5.7 mmol/l                                     |
| <b><i>NEUROD1/BETA2</i></b> |            |       |              |                                                                                       |
| Gong, 2012 (23)             | A45T       | FG    | 8 wks        | AA: -2.8 mmol/l, AT/TT: -1.0 mmol/l; P<0.01                                           |
|                             | A45T       | PPG   | 8 wks        | AA: -6.7 mmol/l, AT/TT: -2.6 mmol/l; P<0.01                                           |
|                             | A45T       | HbA1c | 8 wks        | AA: -3.05% (-33.3 mmol/mol), AT/TT: -2.15% (-23.5 mmol/mol)                           |
| <b><i>PAX4</i></b>          |            |       |              |                                                                                       |
| Gong, 2012 (23)             | R121W      | FG    | 8 wks        | RR: -2.6 mmol/l, RW/WW: -1.0 mmol/l; P=0.053                                          |
|                             | R121W      | PPG   | 8 wks        | RR: -6.6 mmol/l, RW/WW: -2.9 mmol/l; P=0.046                                          |
|                             | R121W      | HbA1c | 8 wks        | RR: -2.73% (-29.8 mmol/mol), RW/WW: -1.31% (-14.3 mmol/mol)                           |
| <b><i>NAMPT</i></b>         |            |       |              |                                                                                       |
| Sheng, 2011 (24)            | [-3186C/T] | FG    | 8 wks        | CC: -2.6 mmol/l, CT: -2.0 mmol/l, TT: -1.7 mmol/l                                     |
|                             | [-3186C/T] | PPG   | 8 wks        | CC: -5.4 mmol/l, CT: -4.8 mmol/l, TT: -4.0 mmol/l                                     |
|                             | [-3186C/T] | HbA1c | 8 wks        | CC: -2.04% (-22.3 mmol/mol), CT: -2.36% (-25.8 mmol/mol), TT: -0.93% (-10.2 mmol/mol) |
| <b><i>UCP2</i></b>          |            |       |              |                                                                                       |
| Wang, 2012 (25)             | rs659366   | HbA1c | 8 wks        | <b>GG: -2.38% (-26.0 mmol/l), GA/AA: 1.49% (-16.3 mmol/mol)</b>                       |
|                             | rs659366   | FG    | 8 wks        | <b>GG: -2.7 mmol/l, GA/AA: -1.7 mmol/l</b>                                            |
|                             | rs659366   | PPG   | 8 wks        | GG: -5.1 mmol/l, GA/AA: -4.3 mmol/l                                                   |

Abbreviations: SNP, single nucleotide polymorphism; HbA1c, hemoglobin A1c; FG, fasting glucose; PPG, post-prandial glucose; mo, months; wks, weeks.

SUPPLEMENTARY DATA

**Supplementary Table 7.** Interaction between pioglitazone and selected SNPs for glycemic outcomes

| Author, year      | Gene          | SNP                     | Outcome | Follow up | Mean change from baseline by genotype                                                                  |
|-------------------|---------------|-------------------------|---------|-----------|--------------------------------------------------------------------------------------------------------|
| Bluher, 2003 (26) | <i>PPARG2</i> | rs1801282<br>(Pro12Ala) | HbA1c   | 26 wks    | Pro12Pro: -1.22% (-13.3 mmol/mol), Pro12Ala: -0.97% (-10.6 mmol/mol), Ala12Ala: -1.5% (-16.4 mmol/mol) |
|                   | <i>PPARG2</i> | rs1801282<br>(Pro12Ala) | FG      | 26 wks    | Pro12Pro: -3.0 mmol/l, Pro12Ala: -3.2 mmol/l, Ala12Ala: -2.1 mmol/l                                    |
| Pei, 2013 (27)    | <i>PPARG2</i> | rs1801282<br>(Pro12Ala) | FG      | 12 wks    | Pro12Pro: -1.2 mmol/l, Pro12Ala: -2.2 mmol/l; P =0.015                                                 |
|                   | <i>PPARG2</i> | rs1801282<br>(Pro12Ala) | PPG     | 12 wks    | Pro12Pro: -2.6 mmol/l, Pro12Ala: -0.4 mmol/l                                                           |
|                   | <i>PPARG2</i> | rs1801282<br>(Pro12Ala) | HbA1c   | 12 wks    | Pro12Pro: -0.75% (-8.2 mmol/mol), Pro12Ala: -0.39% (-4.3 mmol/mol); P =0.132                           |
| Saitou, 2010 (28) | <i>ACE</i>    | rs1799752               | HbA1c   | 24 mo     | No difference by genotype                                                                              |
|                   | <i>MTHFR</i>  | rs1801133               | HbA1c   | 24 mo     | No difference by genotype                                                                              |
| Pei, 2013 (27)    | <i>PTPRD</i>  | rs17584499              | FG      | 12 wks    | CC: -1.3 mmol/l, CT/TT: -1.3 mmol/l                                                                    |
|                   | <i>PTPRD</i>  | rs17584499              | PPG     | 12 wks    | CC: -3.2 mmol/l, CT/TT: -0.6 mmol/l; P =0.005                                                          |
|                   | <i>PTPRD</i>  | rs17584499              | HbA1c   | 12 wks    | CC: -0.92% (-10.1 mmol/l), CT/TT: -0.61% (-6.7 mmol/mol)                                               |

Abbreviations: SNPs, single nucleotide polymorphisms; HbA1c, hemoglobin A1c; FG, fasting glucose; wks, weeks; mo, months

SUPPLEMENTARY DATA

**Supplementary Table 8.** Interaction between rosiglitazone and selected SNPs for glycemic outcomes

| Author, year     | SNP        | Outcome | Follow up | Mean change from baseline by genotype                                                 |
|------------------|------------|---------|-----------|---------------------------------------------------------------------------------------|
| <b>ABCA1</b>     |            |         |           |                                                                                       |
| Wang, 2008 (29)  | rs2230806  | HbA1c   | 48 weeks  | GG: -2.09% (-22.8 mmol/mol), AG/AA: -1.73% (-18.9 mmol/mol)                           |
|                  | rs2230806  | FG      | 48 weeks  | GG: -2.8 mmol/l, AG/AA: -2.3 mmol/l                                                   |
|                  | rs2230806  | PPG     | 48 weeks  | GG: -4.7 mmol/l, AG/AA: -4.3 mmol/l                                                   |
|                  | rs4149313  | HbA1c   | 48 weeks  | CC: -1.84% (-20.1 mmol/mol), CT/TT: -1.84% (-20.1 mmol/mol)                           |
|                  | rs4149313  | FG      | 48 weeks  | CC: -2.2 mmol/l, CT/TT: -2.7 mmol/l                                                   |
|                  | rs4149313  | PPG     | 48 weeks  | CC: -4.2 mmol/l, CT/TT: -4.6 mmol/l                                                   |
|                  | rs2230808  | HbA1c   | 48 weeks  | RR: -1.76% (-19.2 mmol/mol), KR/KK: -1.88% (-20.6 mmol/mol)                           |
|                  | rs2230808  | FG      | 48 weeks  | RR: -2.4 mmol/l, KR/KK: -2.4 mmol/l                                                   |
|                  | rs2230808  | PPG     | 48 weeks  | RR: -4.4 mmol/l, KR/KK: -4.4 mmol/l                                                   |
| <b>KCNQ1</b>     |            |         |           |                                                                                       |
| Yu, 2011 (19)    | rs2237892  | HbA1c   | 48 weeks  | TT: -2.24% (-24.5 mmol/mol), CT: -1.83% (-20.0 mmol/mol), CC: -1.8% (-19.7 mmol/mol)  |
|                  | rs2237892  | FG      | 48 weeks  | TT: -3.3 mmol/l, CT: -2.3 mmol/l, CC: -2.4 mmol/l                                     |
|                  | rs2237892  | PPG     | 48 weeks  | TT: -6.7 mmol/l, CT: -4.3 mmol/l, CC: -4.2 mmol/l                                     |
|                  | rs2237895  | HbA1c   | 48 weeks  | AA: -1.51% (-16.5 mmol/mol), AC: -2.07% (-22.6 mmol/mol), CC: -1.73% (-18.9 mmol/mol) |
|                  | rs2237895  | FG      | 48 weeks  | AA: -2.27 mmol/l, AC: -2.44 mmol/l, CC: -2.75 mmol/l                                  |
|                  | rs2237895  | PPG     | 48 weeks  | AA: -5.39 mmol/l, AC: -3.67 mmol/l, CC: -4.21 mmol/l                                  |
|                  | rs2237897  | HbA1c   | 48 weeks  | CC: -1.68% (-18.4 mmol/mol), CT: -1.9% (-20.8 mmol/mol), TT: -2.48% (-26.2 mmol/mol)  |
|                  | rs2237897  | FG      | 48 weeks  | CC: -2.56 mmol/l, CT: -2.2 mmol/l, TT: -2.99 mmol/l                                   |
|                  | rs2237897  | PPG     | 48 weeks  | CC: -3.69 mmol/l, CT: -4.94 mmol/l, TT: -6.3 mmol/l                                   |
| <b>SLC30A8</b>   |            |         |           |                                                                                       |
| Jiang, 2012 (21) | rs13266634 | HbA1c   | 48 weeks  | CC: -1.53% (-16.7 mmol/mol), CT: -2.14% (-23.4 mmol/mol), TT: -1.65% (-18.0 mmol/mol) |
|                  | rs13266634 | FG      | 48 weeks  | CC: -2.2 mmol/l, CT: -2.7 mmol/l, TT: -2.2 mmol/l                                     |
|                  | rs13266634 | PPG     | 48 weeks  | CC: -3.2 mmol/l, CT: -5.3 mmol/l, TT: -4.9 mmol/l                                     |
| <b>RBP4</b>      |            |         |           |                                                                                       |
| Zhou, 2011 (30)  | rs3758539  | FG      | 12 weeks  | GG: -2.9 mmol/l, GA/AA: -1.5 mmol/l <sup>a</sup>                                      |

## SUPPLEMENTARY DATA

|  |            |       |          |                                                                         |
|--|------------|-------|----------|-------------------------------------------------------------------------|
|  | rs3758539  | PPG   | 12 weeks | GG: -4.2 mmol/l, GA/AA: -3.6 mmol/l                                     |
|  | rs3758539  | HbA1c | 12 weeks | GG: -2.03% (-22.2 mmol/mol), GA/AA: -1.39% (-15.2 mmol/mol)             |
|  | rs10882283 | FG    | 12 weeks | TT: -2.8 mmol/l, TG/GG: -2.1 mmol/l                                     |
|  | rs10882283 | PPG   | 12 weeks | TT: -2.9 mmol/l, TG/GG: -3.2 mmol/l                                     |
|  | rs10882283 | HbA1c | 12 weeks | TT: 1.16% (-12.7 mmol/mol), TG/GG: -3.78% (-41.3 mmol/mol) <sup>a</sup> |

Abbreviations: SNP, single nucleotide polymorphism; HbA1c, hemoglobin A1c; FG, fasting glucose; PPG, post-prandial glucose

SUPPLEMENTARY DATA

**Supplementary Table 9.** Interaction between acarbose and selected SNPs for diabetes risk

| Author, year            | SNP        | Follow up | Variant 1  | Referent | Effect Measure           | Result                        |
|-------------------------|------------|-----------|------------|----------|--------------------------|-------------------------------|
| <b>PPARA</b>            |            |           |            |          |                          |                               |
| Andrulionyte, 2007 (31) | rs1800206  | 3.3 yrs   | CG/GG      | CC       | Cumulative incidence     | P for interaction <0.05       |
|                         | rs1800206  | 3.3 yrs   | CG/GG      | CC       | Adjusted OR              | Acarbose: 0.75 (0.39 to 1.46) |
|                         |            |           |            |          |                          | Placebo: 1.93 (1.05 to 3.58)  |
|                         | rs4253776  | 3.3 yrs   | AG/GG      | AA       | Cumulative incidence     | P for interaction <0.05       |
|                         | rs4253776  | 3.3 yrs   | AG/GG      | AA       | Adjusted OR <sup>a</sup> | Acarbose: 1.70 (1.00 to 2.90) |
|                         |            |           |            |          |                          | Placebo: 0.80 (0.50 to 1.26)  |
|                         | rs4253623  | 3.3 yrs   | AG/GG      | AA       | Cumulative incidence     | P for interaction > 0.05      |
|                         | rs135547   | 3.3 yrs   | CG/GG      | CC       | Cumulative incidence     | P for interaction > 0.05      |
|                         | rs135542   | 3.3 yrs   | TC/CC      | TT       | Cumulative incidence     | P for interaction > 0.05      |
|                         | rs135539   | 3.3 yrs   | AC/CC      | AA       | Cumulative incidence     | P for interaction > 0.05      |
|                         | rs4259701  | 3.3 yrs   | GA/AA      | GG       | Cumulative incidence     | P for interaction > 0.05      |
|                         | rs8138102  | 3.3 yrs   | AG/GG      | AA       | Cumulative incidence     | P for interaction > 0.05      |
|                         | rs4253728  | 3.3 yrs   | GA/AA      | GG       | Cumulative incidence     | P for interaction > 0.05      |
|                         | rs11090819 | 3.3 yrs   | GA/AA      | GG       | Cumulative incidence     | P for interaction > 0.05      |
|                         | rs4253778  | 3.3 yrs   | CC         | GC/GG    | Adjusted OR              | Acarbose: 2.28 (0.88 to 5.86) |
|                         |            |           |            |          |                          | Placebo: 1.32 (0.52 to 3.32)  |
|                         | rs4253778  | 3.3 yrs   | CC         | GC/GG    | Cumulative incidence     | P for interaction > 0.05      |
| <b>HNF4A</b>            |            |           |            |          |                          |                               |
| Andrulionyte, 2006 (32) | rs2425637  | 3.3 yrs   | GG, GT, TT |          | Cumulative incidence     | P for interaction = 0.011     |
|                         | rs2425637  | 3.3 yrs   | TT         | GG/GT    | Adjusted OR <sup>a</sup> | Acarbose: 1.53 (0.88 to 2.66) |
|                         |            |           |            |          |                          | Placebo 0.48 (0.28 to 0.82)   |
|                         | rs3818247  | 3.3 yrs   | GG, GT/TT  |          | Cumulative incidence     | P for interaction = 0.030     |
|                         | rs3818247  | 3.3 yrs   | GT/TT      | GG       | Adjusted OR              | Acarbose: 1.70 (1.08 to 2.70) |
|                         |            |           |            |          |                          | Placebo: 0.84 (0.56 to 1.26)  |
|                         | rs4810424  | 3.3 yrs   | GG, GC/CC  |          | Cumulative incidence     | P for interaction > 0.05      |
|                         | rs2071197  | 3.3 yrs   | GG, GA/AA  |          | Cumulative incidence     | P for interaction > 0.05      |
|                         | rs2071197  | 3.3 yrs   | GA/AA      | GG       | Adjusted OR              | Acarbose: 0.48 (0.26 to 0.87) |
|                         |            |           |            |          |                          | Placebo: 0.86 (0.54 to 1.38)  |



SUPPLEMENTARY DATA

|                         |           |         |            |       |                                   |                                                             |
|-------------------------|-----------|---------|------------|-------|-----------------------------------|-------------------------------------------------------------|
|                         | rs736824  | 3.3 yrs | TT, TC, CC |       | Cumulative incidence              | P for interaction > 0.05                                    |
|                         | rs1885088 | 3.3 yrs | GG, GA/AA  |       | Cumulative incidence              |                                                             |
| <b>LIPC</b>             |           |         |            |       |                                   |                                                             |
| Zacharova, 2005 (33)    | rs2070895 | 3 yrs   | GG, AG, AA |       | Cumulative incidence <sup>a</sup> | Acarbose: GG: 32.7%, GA: 32.6%, AA: 50%                     |
|                         |           |         |            |       |                                   | Placebo: GG: 43.6%, GA: 45.8%, AA: 68.0%                    |
|                         | rs2070895 | 3 yrs   | GA, AA     | GG    | Adjusted OR                       | Acarbose: GA: 0.96 (0.58 to 1.58), AA: 1.96 (0.76 to 5.02), |
|                         |           |         |            |       |                                   | Placebo: GA: 1.06 (0.68 to 1.66), AA: 2.49 (0.97 to 6.41)   |
| <b>PPARG2</b>           |           |         |            |       |                                   |                                                             |
| Andrulionyte, 2004 (34) | rs1801282 | 3.3 yrs | Pro12Pro   | 12Ala | Unadjusted OR                     | Acarbose: 1.50 (0.88 to 2.58)                               |
|                         |           |         |            |       |                                   | Placebo: 1.11 (0.69 to 1.76)                                |
|                         | rs1801282 | 3.3 yrs |            |       | Cumulative incidence              | Acarbose: 12Ala: 27.1%, Pro12Pro: 35.8%                     |
|                         |           |         |            |       |                                   | Placebo: 12Ala 44.1%, Pro12Pro: 46.4%                       |
| <b>PPARGC1A</b>         |           |         |            |       |                                   |                                                             |
| Andrulionyte, 2004 (34) | rs8192673 | 3.3 yrs |            |       | Adjusted OR <sup>a</sup>          | Acarbose: 0.73 (0.46 to 1.15)                               |
|                         |           |         |            |       |                                   | Placebo: 1.56 (1.04 to 2.34)                                |
|                         | rs8192673 | 3.3 yrs |            |       | Mean change                       | Acarbose: 482Ser: -0.67 mmol/l, Gly482Gly: -0.28 mmol/l,    |
|                         |           |         |            |       |                                   | Placebo: 482Ser: +0.17 mmol/l, Gly482Gly: +0.67 mmol/l      |

SUPPLEMENTARY DATA

**Supplementary Table 11.** Prioritized list of design, analysis, and reporting items suggested for future pharmacogenetic studies in diabetes

| <b>Design</b>                                                        | <b>Comments/Rationale</b>                                                                                                                                                                     |
|----------------------------------------------------------------------|-----------------------------------------------------------------------------------------------------------------------------------------------------------------------------------------------|
| 1. Evaluate prior suggestive interactions with biologic plausibility | Need replication of interactions to inform translation efforts                                                                                                                                |
| 2. Pre-specify interactions                                          | Pre-specify SNP(s) and medication(s) to avoid selective reporting                                                                                                                             |
| 3. Use experimental design                                           | Assignment of treatment; prospective, standardized data collection                                                                                                                            |
| 4. Include comparison group                                          | Concurrent                                                                                                                                                                                    |
| 5. Use uniform outcomes and follow up                                | Need consensus on relevant outcomes and duration to facilitate comparisons between studies, minimize selective reporting of outcomes, and to inform sample size of future studies             |
| <b>Analysis</b>                                                      |                                                                                                                                                                                               |
| 6. Address population stratification                                 | Ancestry informative markers, stratification on race, restriction on race, etc.                                                                                                               |
| 7. Incorporate method for addressing multiple comparisons            | May be reasonable to use $P < 0.05$ in the context of a single interaction that is a “replication”                                                                                            |
| 8. Estimate sample size prior to study                               | Based on agreed upon primary outcome(s)                                                                                                                                                       |
| <b>Reporting</b>                                                     |                                                                                                                                                                                               |
| 9. Pre-specify gene-drug interactions                                | Provide rationale for evaluation of interaction                                                                                                                                               |
| 10. Provide information on genotyping quality control                | Especially important for <i>de novo</i> studies; report or provide reference to metrics which should include genotype success rate, evaluation of Hardy Weinberg Proportions, sex concordance |
| 11. Provide information on genotyped and non-genotyped subjects      | May be most important for <i>de novo</i> studies in which information on the study population is not provided in prior studies                                                                |

Quality form

**General Questions**

**1. Was the study described as randomized (this includes the use of words such as randomly, random, and randomization)? This does not refer to the parent study. Select one.**

Yes; No; NR

**2. Was the study sample selected based on availability of genotyping results? Select one.**

Yes; No; NR

**3. Does the study describe the number of participants who withdrew or were lost to follow-up after the start of the period of observation? Select one.**

Yes, complete (could replicate); Yes, partial (could not replicate); No

**4. What was the overall percentage of participants who withdrew or were lost to follow-up after the start of the period of observation? Select one.**

≥5%; <5%, NR

**5. If ≥5% of participants were lost to follow-up, was this differential by comparison group? Select one.**

Yes; No; NR

**6. Was adherence to study medications reported? Select one.**

Yes; No

**7. Was an intention-to-treat (ITT) analysis used for the main comparison and adverse events? Select one.**

Yes, for main comparison; Yes, for adverse events; Yes, for both main comparison and adverse events; No; NR; n/a

**8. Was there ≥10% missing data overall for the association between the pharmacogenetic interaction and the main outcome? Select one.**

## SUPPLEMENTARY DATA

Yes; No; NR

**9. If  $\geq 10\%$  missing data (Yes to #8), how were missing data handled (select all that apply)?**

Excluded

Last observation carried forward (LOCF)

Multiple Imputation

Other (specify):

Not reported

**10. Were controls at risk for the same amount of time as cases (i.e., same potential exposure time)? Select one.**

Yes; No; NR; n/a

### **Genomics-specific Questions**

**11. Were the associations reported specified a priori? Select one.**

Yes; No, designated as exploratory; NR

**12. Are methods for genotyping reported (select all that apply)?**

Yes

No

Referenced

**13. Specify genotyping method: Select one.**

DNA array; PCR; Sequenom; Other (specify); NR

**14. For studies using genome-wide association study (GWAS) data, was the allele-calling algorithm (e.g., BRLMM, Birdsweet) specified? Select one.**

Yes; No; n/a

**15. For studies using GWAS data, what was the mean genotype call (success) rate? Select one.**

$\geq 95\%$ ;  $< 95\%$ ; n/a

## SUPPLEMENTARY DATA

**16. For studies not using GWAS data, was the genotype success rate for each SNP  $\geq 95\%$ ? Select one.**

Yes; No; NR; n/a

**17. What was the duplicate genotyping concordance? Select one.**

$\geq 90\%$ ;  $< 90\%$ ; NR

**18. Which of the following data cleaning strategies for genotyping were used in the study (select all that apply)?**

Test for Hardy Weinberg Equilibrium

Verification of sex concordance

Verification of race/ethnicity concordance

Not reported

Other (specify):

**19. If Hardy-Weinberg Equilibrium (HWE) checked and alleles were not in HWE, how were they handled? Select one.**

n/a (HWE not checked); Excluded based on P value; NR; Other (specify)

**20. Was the staff performing genotyping masked to outcome? Select one.**

Yes; No; NR

**21. Were samples randomly scattered across plates (e.g., cases and controls, active drug and placebo)? Select one.**

Yes; No; NR; n/a

**22. Was the study funded or supported by a pharmaceutical company? Select one.**

Yes; No; NR

**23. Please comment on any other quality issues if present:**

## SUPPLEMENTARY DATA

### References

1. Zhou K, Donnelly LA, Kimber CH, Donnan PT, Doney AS, Leese G, et al.: Reduced-function *SLC22A1* polymorphisms encoding Organic Cation Transporter 1 and glycemic response to metformin: A GoDarts study. *Diabetes* 2009;58:1434-1439
2. Jablonski KA, McAteer JB, de Bakker PIW, Franks PW, Pollin TI, Hanson RL, et al.: Common variants in 40 genes assessed for diabetes incidence and response to metformin and lifestyle intervention in the Diabetes Prevention Program. *Diabetes* 2010;59:2672-2681
3. Tkac I, Klimcakova L, Javorsky M, Fabianova M, Schroner Z, Hermanova H, et al.: Pharmacogenomic association between a variant in *SLC47A1* gene and therapeutic response to metformin in type 2 diabetes. *Diabetes Obes Metab* 2013;15:189-191
4. Florez JC, Jablonski KA, McAteer JB, Franks PW, Mason CC, Mather K, et al.: Effects of genetic variants previously associated with fasting glucose and insulin in the Diabetes Prevention Program. *PLoS One* 2012;7:e44424
5. Choi JH, Yee SW, Ramirez AH, Morrissey KM, Jang GH, Joski PJ, et al.: A common 5'-UTR variant in *MATE2-K* is associated with poor response to metformin. *Clin Pharmacol Ther* 2011;90:674-684
6. Zhou K, Bellenguez C, Spencer CC, Bennett AJ, Coleman RL, Tavendale R, et al.: Common variants near *ATM* are associated with glycemic response to metformin in type 2 diabetes. *Nat Genet* 2011;43:117-120
7. Florez JC, Jablonski KA, Taylor A, Mather K, Horton E, White NH, et al.: The C allele of *ATM* rs11212617 does not associate with metformin response in the Diabetes Prevention Program. *Diabetes Care* 2012;35:1864-1867
8. Florez JC, Jablonski KA, Kahn SE, Franks PW, Dabelea D, Hamman RF, et al.: Type 2 diabetes-associated missense polymorphisms *KCNJ11* E23K and *ABCC8* A1369S influence progression to diabetes and response to interventions in the Diabetes Prevention Program. *Diabetes* 2007;56:531-536
9. Pearson ER, Donnelly LA, Kimber C, Whitley A, Doney AS, McCarthy MI, et al.: Variation in *TCF7L2* influences therapeutic response to sulfonylureas: A GoDarts study. *Diabetes* 2007;56:2178-2182
10. Florez JC, Jablonski KA, Bayley N, Pollin TI, de Bakker PI, Shuldiner AR, et al.: *TCF7L2* polymorphisms and progression to diabetes in the Diabetes Prevention Program. *The New England Journal of Medicine* 2006;355:241-250
11. Florez JC, Jablonski KA, McAteer J, Sandhu MS, Wareham NJ, Barroso I, et al.: Testing of diabetes-associated *WFS1* polymorphisms in the Diabetes Prevention Program. *Diabetologia* 2008;51:451-457

## SUPPLEMENTARY DATA

12. Moore AF, Jablonski KA, McAteer JB, Saxena R, Pollin TI, Franks PW, et al.: Extension of type 2 diabetes genome-wide association scan results in the Diabetes Prevention Program. *Diabetes* 2008;57:2503-2510
13. Moore AF, Jablonski KA, Mason CC, McAteer JB, Arakaki RF, Goldstein BJ, et al.: The association of *ENPP1* K121Q with diabetes incidence is abolished by lifestyle modification in the Diabetes Prevention Program. *J Clin Endocrinol Metab* 2009;94:449-455
14. Dong M, Gong ZC, Dai XP, Lei GH, Lu HB, Fan L, et al.: Serine racemase rs391300 G/A polymorphism influences the therapeutic efficacy of metformin in Chinese patients with diabetes mellitus type 2. *Clin Exp Pharmacol Physiol* 2011;38:824-829
15. Gloyn AL, Hashim Y, Ashcroft SJ, Ashfield R, Wiltshire S, Turner RC: Association studies of variants in promoter and coding regions of beta-cell ATP-sensitive K-channel genes *SUR1* and *Kir6.2* with type 2 diabetes mellitus (UKPDS 53). *Diabet Med* 2001;18:206-212
16. Suzuki K, Yanagawa T, Shibasaki T, Kaniwa N, Hasegawa R, Tohkin M: Effect of *CYP2C9* genetic polymorphisms on the efficacy and pharmacokinetics of glimepiride in subjects with type 2 diabetes. *Diabetes Res Clin Pract* 2006;72:148-154
17. Becker ML, Visser LE, Trienekens PH, Hofman A, van Schaik RH, Stricker BH: Cytochrome p450 2C9 \*2 and \*3 polymorphisms and the dose and effect of sulfonylurea in type II diabetes mellitus. *Clin Pharmacol Ther* 2008;83:288-292
18. He YY, Zhang R, Shao XY, Hu C, Wang CR, Lu JX, et al.: Association of *KCNJ11* and *ABCC8* genetic polymorphisms with response to repaglinide in Chinese diabetic patients. *Acta Pharmacol Sin* 2008;29:983-989
19. Yu W, Hu C, Zhang R, Wang C, Qin W, Lu J, et al.: Effects of *KCNQ1* polymorphisms on the therapeutic efficacy of oral antidiabetic drugs in Chinese patients with type 2 diabetes. *Clin Pharmacol Ther* 2011;89:437-442
20. Huang Q, Yin JY, Dai XP, Wu J, Chen X, Deng CS, et al.: Association analysis of *SLC30A8* rs13266634 and rs16889462 polymorphisms with type 2 diabetes mellitus and repaglinide response in Chinese patients. *Eur J Clin Pharmacol* 2010;66:1207-1215
21. Jiang F, Li Q, Hu C, Zhang R, Wang CR, Yu WH, et al.: Association of a *SLC30A8* genetic variant with monotherapy of repaglinide and rosiglitazone effect in newly diagnosed type 2 diabetes patients in china. *Biomed Environ Sci* 2012;25:23-29
22. Qin W, Zhang R, Hu C, Wang CR, Lu JY, Yu WH, et al.: A variation in *NOS1AP* gene is associated with repaglinide efficacy on insulin resistance in type 2 diabetes of Chinese. *Acta Pharmacol Sin* 2010;31:450-454

## SUPPLEMENTARY DATA

23. Gong ZC, Huang Q, Dai XP, Lei GH, Lu HB, Yin JY, et al.: *NEUROD1* A45T and *PAX4* R121W polymorphisms are associated with plasma glucose level of repaglinide monotherapy in Chinese patients with type 2 diabetes. *Br J Clin Pharmacol* 2012;74:501-509
24. Sheng FF, Dai XP, Qu J, Lei GH, Lu HB, Wu J, et al.: *NAMPT* -3186C/T polymorphism affects repaglinide response in Chinese patients with type 2 diabetes mellitus. *Clin Exp Pharmacol Physiol* 2011;38:550-554
25. Wang S, Se YM, Liu ZQ, Lei MX, Hao B, Sun ZX, et al.: Effect of genetic polymorphism of *UCP2*-866 G/A on repaglinide response in Chinese patients with type 2 diabetes. *Pharmazie* 2012;67:74-79
26. Bluher M, Lubben G, Paschke R: Analysis of the relationship between the Pro12Ala variant in the *PPAR-gamma2* gene and the response rate to therapy with pioglitazone in patients with type 2 diabetes. *Diabetes care* 2003;26:825-831
27. Pei Q, Huang Q, Yang GP, Zhao YC, Yin JY, Song M, et al.: *PPAR-gamma2* and *PTPRD* gene polymorphisms influence type 2 diabetes patients' response to pioglitazone in China. *Acta Pharmacol Sin* 2013;34:255-261
28. Saitou M, Osonoi T, Kawamori R, Katakami N, Kaneto H, Matsuhisa M, et al.: Genetic risk factors and the anti-atherosclerotic effect of pioglitazone on carotid atherosclerosis of subjects with type 2 diabetes--a retrospective study. *J Atheroscler Thromb* 2010;17:386-394
29. Wang J, Bao YQ, Hu C, Zhang R, Wang CR, Lu JX, et al.: Effects of *ABCA1* variants on rosiglitazone monotherapy in newly diagnosed type 2 diabetes patients. *Acta Pharmacol Sin* 2008;29:252-258
30. Zhou F, Huang Q, Dai X, Yin J, Wu J, Zhou H, et al.: Impact of retinol binding protein 4 polymorphism on rosiglitazone response in Chinese type 2 diabetic patients. *Zhong Nan Da Xue Xue Bao Yi Xue Ban* 2011;36:949-957
31. Andrulionyte L, Kuulasmaa T, Chiasson JL, Laakso M: Single nucleotide polymorphisms of the peroxisome proliferator-activated receptor-alpha gene (*PPARA*) influence the conversion from impaired glucose tolerance to type 2 diabetes: The STOP-NIDDM Trial. *Diabetes* 2007;56:1181-1186
32. Andrulionyte L, Laukkanen O, Chiasson JL, Laakso M: Single nucleotide polymorphisms of the *HNF4alpha* gene are associated with the conversion to type 2 diabetes mellitus: The STOP-NIDDM Trial. *J Mol Med (Berl)* 2006;84:701-708
33. Zacharova J, Todorova BR, Chiasson JL, Laakso M: The G-250A substitution in the promoter region of the hepatic lipase gene is associated with the conversion from impaired glucose tolerance to type 2 diabetes: The STOP-NIDDM Trial. *J Intern Med* 2005;257:185-193
34. Andrulionyte L, Zacharova J, Chiasson JL, Laakso M: Common polymorphisms of the *PPAR-gamma2* (Pro12Ala) and *PGC-1alpha* (Gly482Ser) genes are associated with the conversion from impaired glucose tolerance to type 2 diabetes in the STOP-NIDDM Trial. *Diabetologia* 2004;47:2176-2184
