# Supplementary material for: The Pharmacogenetics of Type 2 Diabetes: A Systematic Review
Source: Oxford University Press journal article supplement (doi:10.2337/dc13-1276), 2014-02-11
Supplement: dc131276supplementarydata2.pdf [file dc131276supplementarydata2.pdf]

| Appendix Table 10. Quality information from included studies |             |                            |                              |                               |                                 |                      |                    |                                   |                                                   |                                                             |                                                                                                                                    |                                  |                                                                          |                                                                                                              |                          |                |                        |             |                                          |                 |                                                                              |                     |         |        |                   |                                   |
|--------------------------------------------------------------|-------------|----------------------------|------------------------------|-------------------------------|---------------------------------|----------------------|--------------------|-----------------------------------|---------------------------------------------------|-------------------------------------------------------------|------------------------------------------------------------------------------------------------------------------------------------|----------------------------------|--------------------------------------------------------------------------|--------------------------------------------------------------------------------------------------------------|--------------------------|----------------|------------------------|-------------|------------------------------------------|-----------------|------------------------------------------------------------------------------|---------------------|---------|--------|-------------------|-----------------------------------|
| Author, year                                                 | Randomized? | Genotyping selection bias? | Loss to follow up described? | Loss to follow up quantified? | Differential loss to follow up? | Adherence described? | Missing data >10%? | Method for handling missing data? | Selective reporting -- associations prespecified? | Population stratification for race                          | Addressed Multiple Comparisons?                                                                                                    | Methods for genotyping reported? | Genotyping method                                                        | Genotyping method detail                                                                                     | Allele-calling algorithm | GWAS call rate | SNP-specific call rate | Concordance | Concordance detail                       | HWE             | HWE methods                                                                  | Other genotyping QC | Masking | Plates | Industry support? | Case-control selection described? |
| <b>Metformin</b>                                             |             |                            |                              |                               |                                 |                      |                    |                                   |                                                   |                                                             |                                                                                                                                    |                                  |                                                                          |                                                                                                              |                          |                |                        |             |                                          |                 |                                                                              |                     |         |        |                   |                                   |
| Zhou 2009                                                    | No          | NR                         | No                           | NR                            | NR                              | Yes                  | NR                 |                                   | Yes                                               | NR                                                          | NR                                                                                                                                 | Yes                              | PCR                                                                      | Taqman allelic-discrimination assay                                                                          | No                       | Not GWAS       | Yes                    | ≥90%        |                                          | HWE             | In HWE                                                                       |                     | NR      | NR     | No                | N/A                               |
| Moore 2009                                                   | No          | Yes                        | No                           | NR                            | No                              | No                   | NR                 |                                   | Yes                                               | Adjusted for self-reported race/ethnicity                   | Holm procedure                                                                                                                     | Yes                              | allele-specific primer ext of multiplex amplified, mass spec w/ Sequenom | N/A                                                                                                          | Not GWAS                 | Yes            | NR                     |             | HWE                                      | In HWE          |                                                                              | NR                  | NR      | Yes    | N/A               |                                   |
| Moore 2008                                                   | No          | Yes                        | No                           | NR                            | NR                              | No                   | NR                 |                                   | Yes                                               | Adjusted for self-reported race/ethnicity                   | Holm procedure                                                                                                                     | Yes                              | allele-specific primer ext of multiplex amplified, mass spec w/ Sequenom | N/A                                                                                                          | Not GWAS                 | Yes            | NR                     |             | HWE                                      | In HWE          |                                                                              | NR                  | NR      | Yes    | N/A               |                                   |
| Florez 2008                                                  | No          | Yes                        | No                           | NR                            | NR                              | No                   | NR                 |                                   | Yes                                               | Conducted analyses in all ppts and then in only white ppts  | Explained and used P<0.05                                                                                                          | Yes                              | Sequenom                                                                 |                                                                                                              | N/A                      | Not GWAS       | Yes                    | NR          |                                          | HWE             | Genotypes manually corrected and used computerized clustering to achieve HWE |                     | NR      | NR     | Yes               | N/A                               |
| Florez 2007                                                  | No          | Yes                        | Partial                      | NR                            | NR                              | No                   | NR                 |                                   | Yes                                               | Stratified and adjusted for race                            | Modified alpha level                                                                                                               | Yes                              | Sequenom                                                                 |                                                                                                              | N/A                      | Not GWAS       | Yes                    | NR          |                                          | HWE             | In HWE                                                                       |                     | NR      | NR     | Yes               | N/A                               |
| Florez 2006                                                  | No          | Yes                        | No                           | NR                            | NR                              | No                   | NR                 |                                   | Yes                                               | Stratified analysis                                         | Holm procedure                                                                                                                     | Yes                              | Sequenom                                                                 |                                                                                                              | N/A                      | Not GWAS       | Yes                    | ≥80%        |                                          | HWE             | In HWE                                                                       |                     | NR      | NR     | Yes               | N/A                               |
| Zhou 2011                                                    | No          | Yes                        | No                           | NR                            | NR                              | Yes                  | NR                 |                                   | No                                                | No method, genomic inflation lambda was low                 | NR                                                                                                                                 | Yes                              | Referenced, Array                                                        | Affy Genome-Wide Human SNP Array 6.0.                                                                        | Yes                      | ≥95%           | N/A                    | ≥90%        |                                          | HWE             | P-value                                                                      | Relatedness (inclu  | NR      | NR     | No                | N/A                               |
| Jablonski 2010                                               | No          | Yes                        | No                           | NR                            | NR                              | No                   | NR                 |                                   | NR                                                | Adjusted for individual admixture                           | Permutation P                                                                                                                      | Yes                              | Array                                                                    | custom 1,536-SNP oligonucleotide pool array for the Illumina BeadArray platform                              | N/A                      | Not GWAS       | Yes                    | NR          |                                          | NR              | NR                                                                           |                     | NR      | NR     | Yes               | n/a                               |
| Pearson 2007                                                 | No          | NR                         | No                           | NR                            | NR                              | Yes                  | NR                 |                                   | Yes                                               | NR                                                          | NR                                                                                                                                 | Yes                              | Referenced                                                               | PCR Taqman allelic-discrimination assay                                                                      | N/A                      | Not GWAS       | Yes                    | ≥90%        |                                          | HWE             | In HWE                                                                       |                     | NR      | n/a    | No                | N/A                               |
| Florez, 2012                                                 | No          | Yes                        | No                           | NR                            | NR                              | No                   | NR                 |                                   | Yes                                               | Adjusted for self-reported race/ethnicity                   | Explained and used P<0.05                                                                                                          | Yes                              | Sequenom                                                                 | ILEX platform                                                                                                | n/a                      | Not GWAS       | Yes                    | NR          |                                          | NR              | NR                                                                           |                     | NR      | NR     | Yes               | N/A                               |
| Florez, 2012                                                 | No          | Yes                        | No                           | NR                            | NR                              | No                   | NR                 |                                   | Yes                                               | showed pooled and stratified analyses                       | Did not discuss (used P<0.05)                                                                                                      | Yes                              | Sequenom                                                                 | ILEX platform                                                                                                | n/a                      | Not GWAS       | Yes                    | NR          |                                          | NR              | NR                                                                           |                     | NR      | NR     | Yes               | N/A                               |
| Dong, 2011                                                   | No          | Yes                        | No                           | NR                            | NR                              | No                   | NR                 |                                   | Yes                                               | Single race/ethnicity studied                               | N/A (single SNP)                                                                                                                   | Yes                              | PCR                                                                      | ABI 3700 sequencing                                                                                          | n/a                      | Not GWAS       | NR                     | NR          |                                          | HWE             | In HWE                                                                       |                     | NR      | NR     | No                | N/A                               |
| Tkac, 2013                                                   | No          | Yes                        | No                           | NR                            | NR                              | No                   | NR                 | NR                                | Yes                                               | Single race/ethnicity studied                               | Did not discuss (used P<0.05)                                                                                                      | Yes                              | PCR                                                                      | Followed by melting analysis                                                                                 | n/a                      | n/a            | NR                     | NR          |                                          | HWE             | In HWE                                                                       |                     | NR      | NR     | No                | N/A                               |
| Choi, 2011                                                   | No          | Yes                        | No                           | NR                            | NR                              | No                   | NR                 | Excluded                          | Yes                                               | race-stratified and race-combined w/out adjustment for race | Did not discuss (used P<0.05)                                                                                                      | No                               | PCR                                                                      | TaqMan                                                                                                       | n/a                      | n/a            | NR                     | ≥90%        |                                          | HWE             | In HWE                                                                       |                     | NR      | NR     | No                | N/A                               |
| <b>Sulfonylureas</b>                                         |             |                            |                              |                               |                                 |                      |                    |                                   |                                                   |                                                             |                                                                                                                                    |                                  |                                                                          |                                                                                                              |                          |                |                        |             |                                          |                 |                                                                              |                     |         |        |                   |                                   |
| Becker 2008                                                  | No          | NR                         | No                           | NR                            | NR                              | No                   | NR                 |                                   | Yes                                               | Single race/ethnicity studied                               | Did not discuss (used P<0.05)                                                                                                      | Yes                              | Referenced                                                               | PCR                                                                                                          | N/A                      | Not GWAS       | NR                     | ≥90%        |                                          | HWE             | In HWE                                                                       |                     | NR      | NR     | NR                | N/A                               |
| Pearson 2007 (see above)                                     |             |                            |                              |                               |                                 |                      |                    |                                   |                                                   |                                                             |                                                                                                                                    |                                  |                                                                          |                                                                                                              |                          |                |                        |             |                                          |                 |                                                                              |                     |         |        |                   |                                   |
| Suzuki 2006                                                  | No          | NR                         | No                           | NR                            | NR                              | No                   | NR                 |                                   | NR                                                | Single race/ethnicity studied                               | N/A (single SNP)                                                                                                                   | yes                              | PCR                                                                      | TaqMan                                                                                                       | N/A                      | Not GWAS       | NR                     | NR          |                                          | NR              |                                                                              |                     | NR      | NR     | Yes               | N/A                               |
| Gloyn 2001                                                   | No          | NR                         | No                           | NR                            | NR                              | No                   | NR                 |                                   | Yes                                               | Single race/ethnicity studied                               | NR                                                                                                                                 | Yes                              | RFLP (PCR-based, but not Taqman)                                         |                                                                                                              | N/A                      | Not GWAS       | NR                     | NR          |                                          | HWE not checked |                                                                              |                     | NR      | NR     | No                | N/A                               |
| <b>Repaglinide</b>                                           |             |                            |                              |                               |                                 |                      |                    |                                   |                                                   |                                                             |                                                                                                                                    |                                  |                                                                          |                                                                                                              |                          |                |                        |             |                                          |                 |                                                                              |                     |         |        |                   |                                   |
| He 2008                                                      | No          | NR                         | Complete                     | <5%                           | No                              | No                   | No                 |                                   | No                                                | Single race/ethnicity studied                               | Did not discuss (used P<0.05)                                                                                                      | Yes                              | PCR                                                                      |                                                                                                              | N/A                      | Not GWAS       | Yes                    | ≥90%        |                                          | HWE             | In HWE                                                                       |                     | NR      | NR     | No                | N/A                               |
| Yu 2011                                                      | No          | No                         | Complete                     | ≥5%                           | No                              | No                   | Yes                | Excluded                          | No                                                | Single race/ethnicity studied                               | No correction                                                                                                                      | Yes                              | Referenced                                                               | Sequenom; MassARRAY Compact Analyzer                                                                         | N/A                      | Not GWAS       | NR                     | NR          |                                          | HWE             | In HWE                                                                       |                     | NR      | NR     | No                | N/A                               |
| Qin 2010                                                     | No          | NR                         | Partial                      | <5%                           | NR                              | No                   | No                 |                                   | No                                                | Single race/ethnicity studied                               | N/A (single SNP)                                                                                                                   | Yes                              | PCR-sequencing                                                           |                                                                                                              | N/A                      | Not GWAS       | NR                     | NR          |                                          | HWE             | In HWE                                                                       |                     | NR      | NR     | No                | N/A                               |
| Huang 2010                                                   | No          | NR                         | NR                           | NR                            | NR                              | No                   | NR                 |                                   | No                                                | Single race/ethnicity studied                               | Did not discuss (used P<0.05)                                                                                                      | Yes                              | PCR-RFLP                                                                 |                                                                                                              | N/A                      | Not GWAS       | NR                     | NR          |                                          | HWE             | In HWE                                                                       |                     | NR      | NR     | No                | N/A                               |
| Gong, 2012                                                   | No          | Yes                        | No                           | NR                            | NR                              | No                   | NR                 | NR                                | Yes                                               | Single race/ethnicity studied                               | Did not discuss (used P<0.05)                                                                                                      | Yes                              | PCR                                                                      | RFLP                                                                                                         | N/A                      | n/a            | NR                     | NR          |                                          | HWE             | In HWE                                                                       |                     | NR      | NR     | No                | N/A                               |
| Jiang 2012                                                   | No          | Yes                        | Partial                      | >=5%                          | NR                              | No                   | Yes                | NR                                | Yes                                               | Single race/ethnicity studied                               | N/A (single SNP)                                                                                                                   | Yes                              | Sequenom                                                                 | MassARRAY platform                                                                                           | N/A                      | n/a            | Yes                    | NR          |                                          | HWE             | In HWE                                                                       |                     | No      | NR     | No                | N/A                               |
| Sheng, 2011                                                  | No          | Yes                        | No                           | NR                            | NR                              | No                   | NR                 | NR                                | Yes                                               | Single race/ethnicity studied                               | N/A (single SNP)                                                                                                                   | Yes                              | PCR                                                                      | RFLP                                                                                                         | N/A                      | n/a            | NR                     | NR          |                                          | HWE             | NR                                                                           |                     | NR      | NR     | No                | N/A                               |
| Wang, 2012                                                   | No          | Yes                        | No                           | NR                            | NR                              | No                   | NR                 | NR                                | Yes                                               | Single race/ethnicity studied                               | N/A (single SNP)                                                                                                                   | Yes                              | PCR                                                                      | RFLP                                                                                                         | N/A                      | n/a            | NR                     | NR          |                                          | NR              | NR                                                                           |                     | NR      | NR     | NR                | N/A                               |
| <b>Pioglitazone</b>                                          |             |                            |                              |                               |                                 |                      |                    |                                   |                                                   |                                                             |                                                                                                                                    |                                  |                                                                          |                                                                                                              |                          |                |                        |             |                                          |                 |                                                                              |                     |         |        |                   |                                   |
| Blüher 2003                                                  | No          | NR                         | Complete                     | <5%                           | No                              | No                   | No                 |                                   | NR                                                | NR                                                          | Did not discuss (used P<0.05)                                                                                                      | Yes                              | PCR                                                                      | Probe not listed, primers and denaturing gradient gel electrophoresis used to detect PPAR-γ2 gene mutations. | n/a                      | Not GWAS       | NR                     | NR          |                                          | HWE             | Checked but no change based on P value 0.08                                  |                     | NR      | NR     | Yes               | N/A                               |
| Saitou 2010                                                  | No          | No                         | Complete                     | <5%                           | No                              | No                   | NR                 | NR                                | No                                                | Single race/ethnicity studied                               | NR                                                                                                                                 | Yes                              | Colorimetry-based allele-specific DNA primer probe                       |                                                                                                              | N/A                      | Not GWAS       | NR                     | NR          |                                          | NR              | NR                                                                           |                     | NR      | NR     | No                | N/A                               |
| Pei, 2013                                                    | No          | No                         | No                           | NR                            | NR                              | No                   | NR                 | NR                                | Yes                                               | Single race/ethnicity studied                               | Did not discuss (used P<0.05)                                                                                                      | Yes                              | Sequenom                                                                 | MassARRAY platform                                                                                           | n/a                      | n/a            | NR                     | NR          |                                          | HWE             | In HWE                                                                       |                     | NR      | NR     | No                | N/A                               |
| <b>Rosiglitazone</b>                                         |             |                            |                              |                               |                                 |                      |                    |                                   |                                                   |                                                             |                                                                                                                                    |                                  |                                                                          |                                                                                                              |                          |                |                        |             |                                          |                 |                                                                              |                     |         |        |                   |                                   |
| Wang 2008                                                    | No          | NR                         | Complete                     | ≥5%                           | NR                              | No                   | No                 |                                   | NR                                                | Single race/ethnicity studied                               | Did not discuss (used P<0.05)                                                                                                      | yes                              | PCR                                                                      | RFLP                                                                                                         | n/a                      | Not GWAS       | NR                     | ≥90%        | 16 random samples checked                | HWE             | In HWE                                                                       |                     | NR      | n/a    | No                | N/A                               |
| Yu 2011 (see above)                                          |             |                            |                              |                               |                                 |                      |                    |                                   |                                                   |                                                             |                                                                                                                                    |                                  |                                                                          |                                                                                                              |                          |                |                        |             |                                          |                 |                                                                              |                     |         |        |                   |                                   |
| Jiang 2012 (see above)                                       |             |                            |                              |                               |                                 |                      |                    |                                   |                                                   |                                                             |                                                                                                                                    |                                  |                                                                          |                                                                                                              |                          |                |                        |             |                                          |                 |                                                                              |                     |         |        |                   |                                   |
| Zhou, 2011                                                   | No          | Yes                        | No                           | NR                            | NR                              | No                   | NR                 | NR                                | Yes                                               | single race/ethnicity                                       | Did not discuss (used P<0.05)                                                                                                      | Yes                              | PCR                                                                      | RFLP                                                                                                         | n/a                      | n/a            | NR                     | ≥90%        | Stated all repeated ones were concordant | HWE             | NR                                                                           | NR                  | NR      | NR     | NR                | N/A                               |
| <b>Acarbose</b>                                              |             |                            |                              |                               |                                 |                      |                    |                                   |                                                   |                                                             |                                                                                                                                    |                                  |                                                                          |                                                                                                              |                          |                |                        |             |                                          |                 |                                                                              |                     |         |        |                   |                                   |
| Andrullonyte 2007                                            | No          | Yes                        | No                           | NR                            | NR                              | No                   | NR                 |                                   | Yes                                               | Single race/ethnicity studied                               | Permutation and exact test of nominally significant results [resampled dataset and reanalyzed 1000 times, divided p value by 1000] | Yes                              | PCR                                                                      | taqman                                                                                                       | N/A                      | Not GWAS       | Yes                    | ≥90%        |                                          | HWE             | In HWE                                                                       |                     | NR      | NR     | Yes               | N/A                               |
| Andrullonyte 2006                                            | No          | Yes                        | No                           | NR                            | NR                              | No                   | No                 |                                   | Yes                                               | Single race/ethnicity studied                               | Did not discuss (used P<0.05)                                                                                                      | Yes                              | Referenced                                                               | PCR, amplified with GeneAmp PCR, fluoro w/ ABI Prism                                                         | N/A                      | Not GWAS       | NR                     | NR          |                                          | HWE             | +3818247 not in HWE                                                          |                     | NR      | NR     | Yes               | N/A                               |
| Zacharova 2005                                               | No          | Yes                        | No                           | NR                            | NR                              | No                   | NR                 |                                   | Yes                                               | Single race/ethnicity studied                               | N/A (single SNP)                                                                                                                   | Yes                              | PCR                                                                      | taqman                                                                                                       | N/A                      | Not GWAS       | NR                     | NR          |                                          | HWE             | In HWE                                                                       |                     | NR      | NR     | Yes               | N/A                               |
| Andrullonyte 2004                                            | No          | Yes                        | No                           | NR                            | NR                              | No                   | NR                 |                                   | Yes                                               | Single race/ethnicity studied                               | Did not discuss (used P<0.05)                                                                                                      | Yes                              | Referenced                                                               | PCR-RFLP for gly482 ser using dynazyme and PCR-SSCP used for 12ala with dynazyme                             | N/A                      | Not GWAS       | NR                     | NR          |                                          | HWE             | In HWE                                                                       |                     | NR      | NR     | Yes               | N/A                               |
